# Supplementary material for: Sensory evaluations of a novel iron and zinc-enriched powder for the potential treatment and prevention of iron deficiency in women of reproductive age
Source: bioRxiv or medRxiv preprint supplement (doi:10.1101/2022.12.10.22283294), 2023-10-20
Supplement: Supplementary file [file media-1.pdf]

**Table 1.** Sensory properties and overall taste for active and placebo powders across concentrations

| Active Solutions            |                      |                       |                      |         |
|-----------------------------|----------------------|-----------------------|----------------------|---------|
| Sensory Property of Samples | S1 (1 g/L)<br>(N=35) | S2 (2g/L)<br>(N=35)   | S3 (3 g/L)<br>(N=35) | p-value |
| Odour                       | 8 (6-9) <sup>a</sup> | 8 (5-9) <sup>ab</sup> | 6 (4-8) <sup>c</sup> | p<0.05  |
| Colour                      | 9 (8-9) <sup>a</sup> | 9 (8-9) <sup>ab</sup> | 8 (7-9) <sup>c</sup> | p<0.05  |
| Salty                       | 8 (6-9) <sup>a</sup> | 5 (3-8) <sup>b</sup>  | 4 (3-6) <sup>c</sup> | p<0.05  |
| Sweet                       | 8 (7-9) <sup>a</sup> | 7 (6-9) <sup>ab</sup> | 6 (4-9) <sup>c</sup> | p=0.003 |
| Bitter                      | 8 (5-9) <sup>a</sup> | 5 (4-8) <sup>b</sup>  | 4 (3-6) <sup>c</sup> | p<0.05  |
| Umami                       | 9 (6-9)              | 8 (5-9)               | 8 (4-9)              | p=0.169 |
| Sour                        | 9 (8-9) <sup>a</sup> | 6 (4-9) <sup>b</sup>  | 4 (3-5) <sup>c</sup> | p<0.05  |
| Placebo Solutions           |                      |                       |                      |         |
| Sensory Property of Samples | S4 (1 g/L)<br>(N=35) | S5 (2g/L)<br>(N=35)   | S6 (3 g/L)<br>(N=35) | p-value |
| Odour                       | 8 (5-9) <sup>a</sup> | 6 (4-8) <sup>a</sup>  | 4 (3-6) <sup>b</sup> | p<0.05  |
| Colour                      | 8 (7-9) <sup>a</sup> | 6 (4-8) <sup>b</sup>  | 4 (3-7) <sup>c</sup> | p<0.05  |
| Salty                       | 6 (4-7) <sup>a</sup> | 4 (2-5) <sup>b</sup>  | 2 (2-4) <sup>c</sup> | p<0.05  |
| Sweet                       | 7 (6-9) <sup>a</sup> | 6 (4-7) <sup>b</sup>  | 6 (3-8) <sup>b</sup> | p=0.003 |
| Bitter                      | 7 (4-9) <sup>a</sup> | 4 (2-5) <sup>b</sup>  | 3 (2-5) <sup>b</sup> | p<0.05  |
| Umami                       | 7 (4-9)              | 5 (4-7)               | 4 (2-6)              | p=0.07  |
| Sour                        | 7 (4-9) <sup>a</sup> | 4 (3-5) <sup>b</sup>  | 3 (1-4) <sup>c</sup> | p<0.05  |

Hedonic scores of participants' (N=35) evaluation of each sensory property compared within groups for active samples (S1, S2, S3) and placebo samples (S4, S5, S6) at concentrations of 1g/L, 2g/L, and 3g/L. Hedonic scores range from 1-9, where a score of 1=Disliked extremely, 9=Liked extremely, and 5=Neither like nor dislike. Data are median (IQR). Groups with different letters are significantly different (Friedmans two-way analysis of variance by ranks test and Wilcoxon signed-rank test with Bonferroni correction for multiple comparisons, p<0.05).
