# Supplementary material for: Sensory evaluations of a novel iron and zinc-enriched powder for the potential treatment and prevention of iron deficiency in women of reproductive age
Source: bioRxiv or medRxiv preprint supplement (doi:10.1101/2022.12.10.22283294), 2023-10-20
Supplement: Supplementary file [file media-2.pdf]

**Table 2.** Proportion of participant scores for “overall taste” of active and placebo samples

| <b>Hedonic Scores for Participant Liking</b> | <b>Proportion of Participants (n)</b> |           |           |
|----------------------------------------------|---------------------------------------|-----------|-----------|
|                                              | <b>S1</b>                             | <b>S2</b> | <b>S3</b> |
| <b>Active Samples</b>                        |                                       |           |           |
| Dislike (Scores 1-4)                         | 9% (3)                                | 34% (12)  | 74% (26)  |
| Neutral (Score of 5)                         | 9% (3)                                | 9% (3)    | 11% (4)   |
| Like (Scores 6-9)                            | 82% (29)                              | 57% (20)  | 15% (5)   |
| <b>Placebo Samples</b>                       | <b>S4</b>                             | <b>S5</b> | <b>S6</b> |
| Dislike (Scores 1-4)                         | 29% (10)                              | 74% (26)  | 94% (33)  |
| Neutral (Score of 5)                         | 11% (4)                               | 3% (1)    | 0% (0)    |
| Like (Scores 6-9)                            | 60% (21)                              | 23% (8)   | 6% (2)    |

Participants' (N=35) “overall liking” of each sample (S1-S6) using 9-point hedonic scale. Hedonic scores range from 1-9, where a score of 1=Disliked extremely, 9=Liked extremely, and 5=Neither like nor dislike. Active samples S1, S2, S3 contain the mineral-enriched powder at concentrations of 1g/L, 2g/L, and 3g/L, respectively. Placebo samples S4, S5, S6 contain the placebo powder at concentrations of 1g/L, 2g/L, and 3g/L, respectively. Proportion reporting overall disliking of each active and placebo sample include participants who gave hedonic scores between 1-4. Proportion reporting of overall liking of each active and placebo sample include participants who gave the samples hedonic scores between 6-9.
